# Supplementary material
Source: PubMed Central journal article supplement (PMC3811765)
Supplement: IAI.00544-13_zii999090313so1.pdf [file IAI.00544-13_zii999090313so1.pdf]

1 **SUPPLEMENTARY DATA**

2 **Table S 1: Predicted MHC class I and class II binding epitopes from PyAMA-1.**

| MHC-Peptide# | Sequence        | Length | Position | H-2 Kd score*        | H-2 Dd score*        |
|--------------|-----------------|--------|----------|----------------------|----------------------|
| I-1          | YYFILCSI        | 9      | 5        | 0.1                  | 12.4                 |
| I-2          | SLCAKHTSL       | 9      | 160      | 0.9                  | 41.0                 |
| I-3          | QYIAENNDV       | 9      | 455      | 1.1                  | 82.1                 |
| I-4          | VYDKSNSTC       | 9      | 184      | 1.3                  | 57.5                 |
| I-5          | KNFIATTAL       | 9      | 368      | 1.4                  | 68.1                 |
| I-6          | EGPNQVISE       | 9      | 23       | 95.0                 | 0.5                  |
| I-7          | DKPVRSGGL       | 9      | 118      | 40.8                 | 0.7                  |
| I-8          | IGSYKSGQI       | 9      | 327      | 26.4                 | 0.8                  |
| I-9          | ISPITITNL       | 9      | 135      | 11.9                 | 1.2                  |
| I-10         | FTPEKIENY       | 9      | 221      | 91.4                 | 1.2                  |
| I-11         | ENPKQKLLI       | 9      | 474      | 48.6                 | 1.4                  |
| I-12         | MGPRYCSND       | 9      | 203      | 88.0                 | 1.9                  |
| I-13         | AFPETDVHI       | 9      | 127      | 8.1                  | 2.2                  |
| I-14         | KFPRIFIST       | 9      | 416      | 34.0                 | 2.7                  |
| I-15         | GKGYNWGNY       | 9      | 339      | 83.7                 | 3.6                  |
|              |                 |        |          | <b>H2-IAd median</b> | <b>H2-IEd median</b> |
| II-1         | LIGVGIIIVLLVAY  | 15     | 486      | 1.4                  | 86.5                 |
| II-2         | LIIVLIGVGIIIVI  | 15     | 481      | 1.8                  | 80.6                 |
| II-3         | PKQKLLIIIVLIGVG | 15     | 476      | 5.4                  | 81.5                 |
| II-4         | NDKNFIATTALSSTE | 15     | 366      | 6.0                  | 72.6                 |
| II-5         | LLVAYYFKSGKKGEN | 15     | 496      | 65.0                 | 7.2                  |

3

4 \* Putative CD4<sup>+</sup> and CD8<sup>+</sup> T cell epitopes were predicted from the complete PyAMA-1  
 5 protein sequence using computerised MHC-binding prediction algorithms available at  
 6 the Immune Epitope Database (IEDB, [www.iedb.org](http://www.iedb.org); (46)). The top scoring peptides  
 7 predicted to bind with high affinity to MHC class I alleles H-2K<sup>d</sup> and H-2D<sup>d</sup> (1<sup>st</sup> percentile  
 8 of predicted peptides) (top panel) and the top scoring peptides predicted to bind with  
 9 high affinity to MHC class II alleles IA<sup>d</sup> and IE<sup>d</sup> (2<sup>nd</sup> percentile of predicted peptides)  
 10 (Bottom panel) were selected for further study. Highlighted sections show allele-specific  
 11 affinity of these peptides.

12

13 **Figure S 1.**

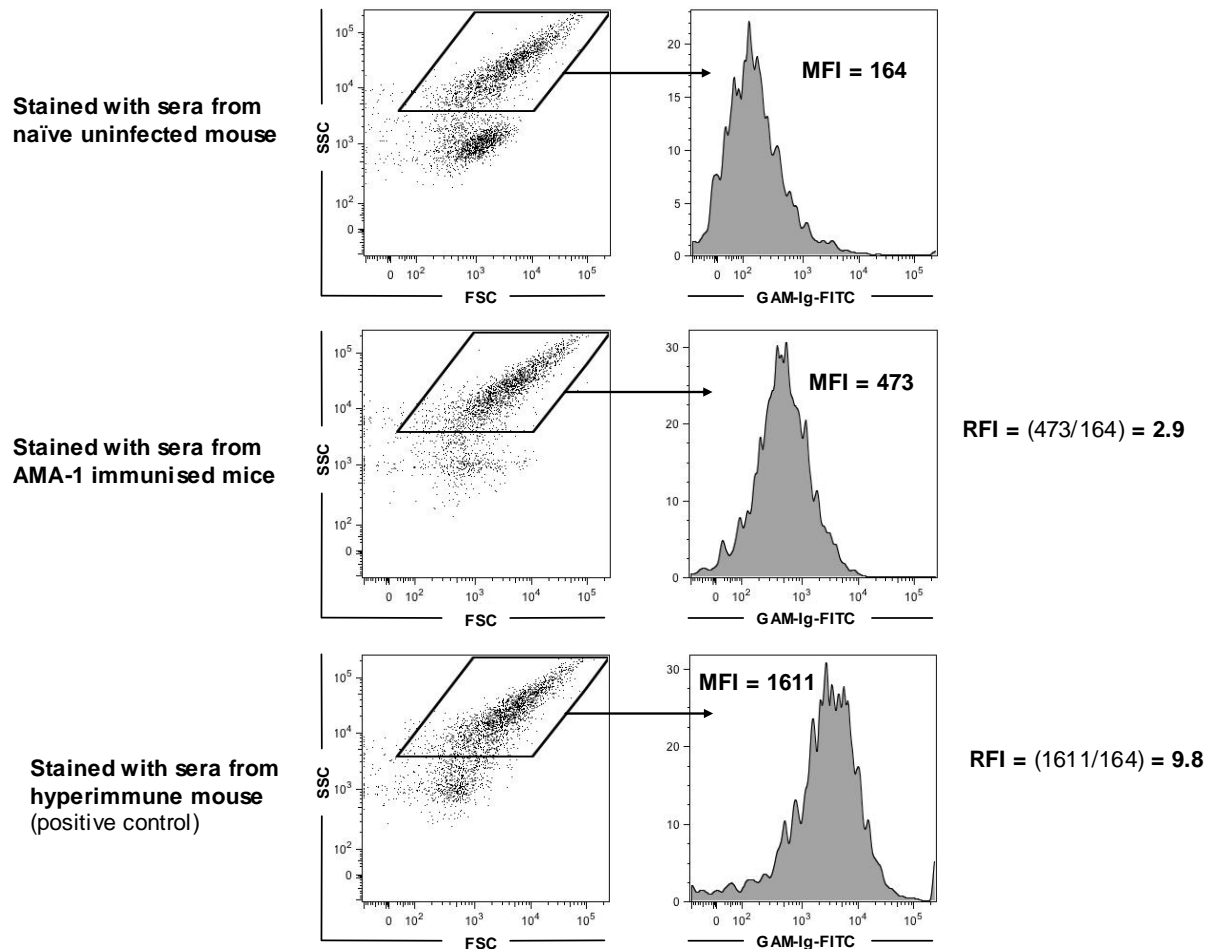

14

15 **Figure S 1: Indirect Fluorescence Antibody Test (IFAT) using whole blood-stage**  
16 **parasite extract.** Flow cytometric analysis of IgG levels binding to *P. yoelii* blood stage  
17 extract in the serum of a naive uninfected mouse (top), an AMA-1 immunised mouse  
18 (middle) and a hyperimmune mouse (bottom). Parasite extract was incubated with  
19 mouse sera and stained with fluorescently labelled anti-mouse IgG antibody. The  
20 median fluorescence intensity (MFI) of the parasite extract (gate on the left) correlates  
21 with the antibody titre in mouse sera. The relative fluorescence intensity (RFI) of  
22 immunised or hyperimmune mice compared to naive uninfected mice is displayed for  
23 comparison.

24 **Figure S 2.**

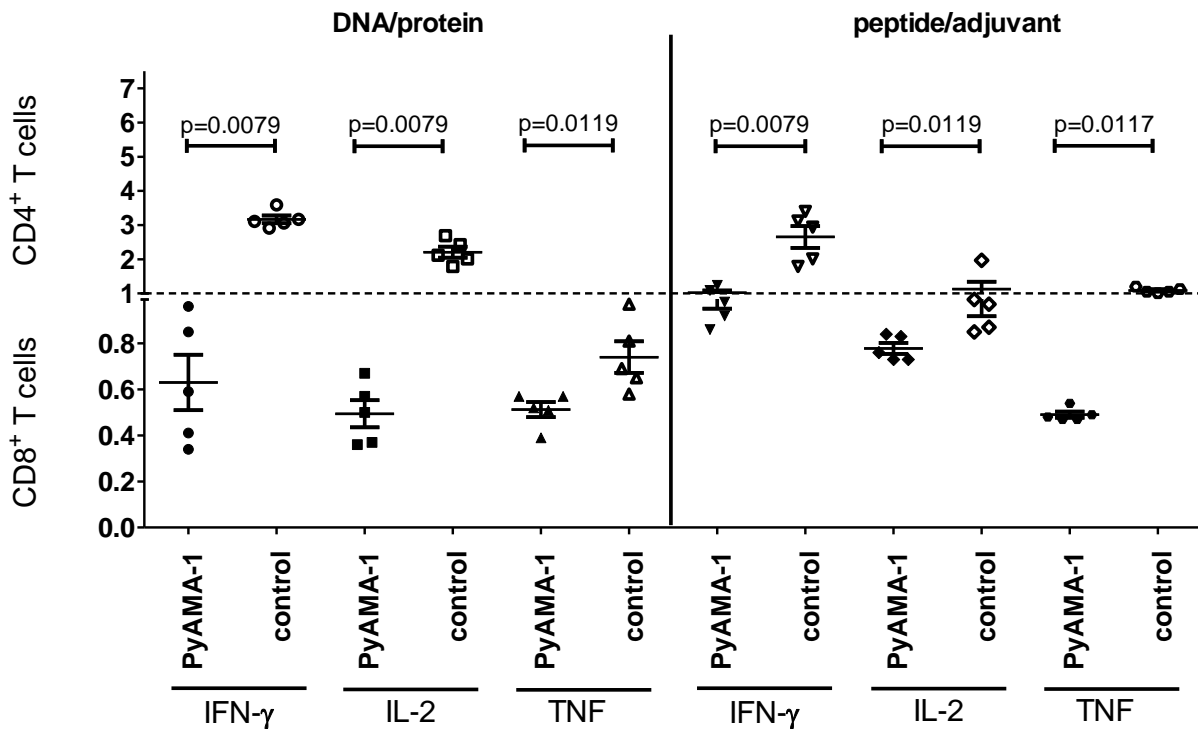

25

26 **Figure S 2: Comparative analysis of Th1 cytokine production in CD4<sup>+</sup> and CD8<sup>+</sup> T**  
 27 **cells.** The frequencies of CD4<sup>+</sup> and CD8<sup>+</sup> T cell population producing IFN-γ, IL-2 or  
 28 TNF were measured by intracellular cytokine staining and the CD4<sup>+</sup>/ CD8<sup>+</sup> ratio was  
 29 calculated for each cytokine secreting population. Statistical comparison of PyAMA-1  
 30 immunised versus no-vaccine or adjuvant only control groups was performed using two-  
 31 tailed Mann-Whitney test; significance was defined as p<0.05.

32 **Figure S 3.**

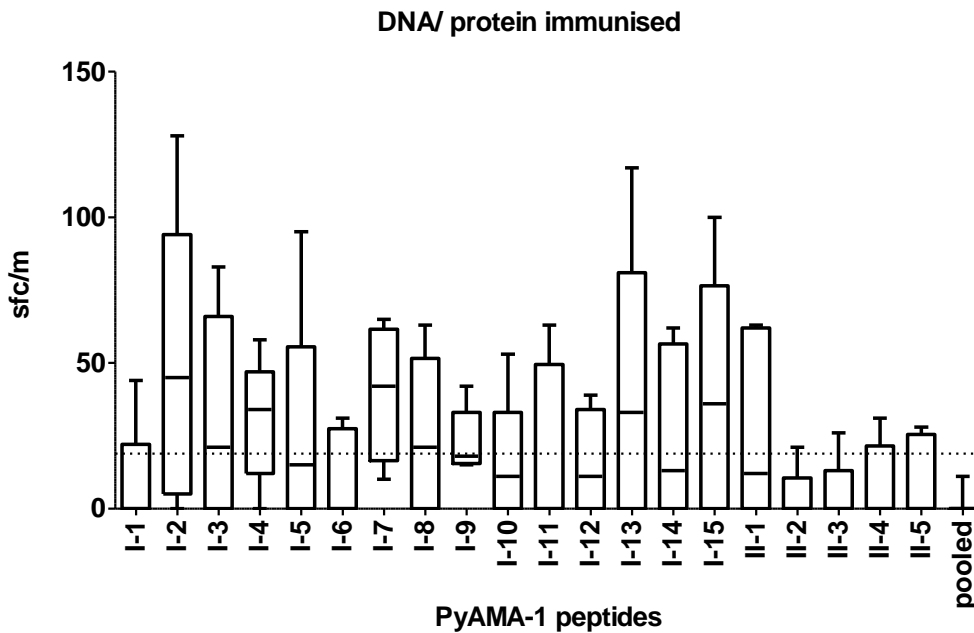

33

34 **Figure S 3: PyAMA-1 peptide reactivity after DNA/protein immunisation.** IFN- $\gamma$   
35 production of splenocytes harvested from mice immunised with DNA/protein at 10 days  
36 after the third immunisation and restimulated with individual peptides or PyAMA-1  
37 peptide pool *in vitro*. Data are presented as mean spot forming cells (SFCs) for  
38 individual mice (n=5) with error bars representing the total range of values. The dotted  
39 line represents the mean background reactivity of unstimulated cells. Statistical  
40 significance was determined by one-way ANOVA and two-tailed Mann-Whitney test,  
41  $p < 0.05$ .

42 **Figure S 4.**

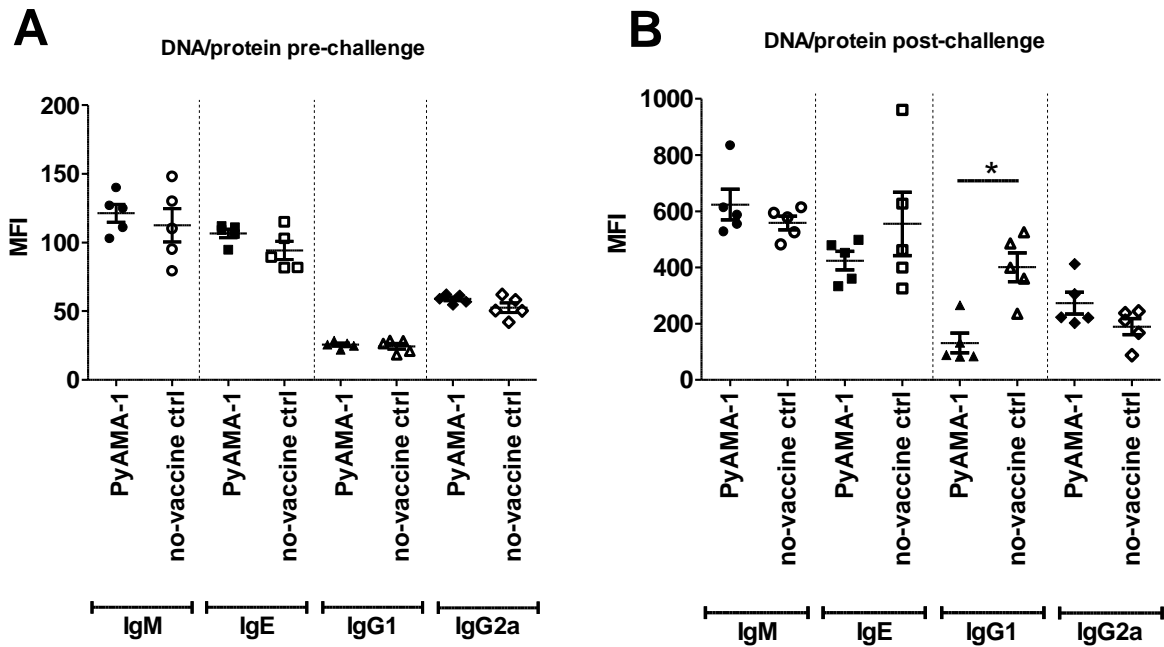

43

44 **Figure S 4: Antibody subtypes induced by PyAMA-1 DNA/protein immunisation.**

45 Flow cytometric analysis of mIgM, mIgG1, IgG2a and mIgE levels binding to *P. yoelii*

46 blood stage extract in the serum of mice **(A)** before and **(B)** after sporozoite challenge.

47 Statistical significance was determined by two-tailed Mann-Whitney test; \*  $p < 0.05$ .

48
